# Supplementary material for: Validation of an abbreviated instrument to assess veterinary client caregiver burden
Source: PubMed Central journal article supplement — J Vet Intern Med. 2019 Apr 29;33(3):1251–9. doi: 10.1111/jvim.15508 (PMC6524077; doi:10.1111/jvim.15508), 2019-04-29
Supplement: JVIM-33-1251-s001.pdf [file JVIM-33-1251-s001.pdf]

**Supporting Table. Stage 2**—Independent factor correlations for the full adapted Zarit Burden Interview (ZBI), Perceived Stress Scale (PSS), and Quality of Life Enjoyment and Satisfaction Questionnaire-Short Form (Q-LES-Q-SF) in a combined sample of veterinary clients recruited through a small animal general veterinary hospital and a large academic hospital with specialty services, who reported ownership of a sick dog or cat in an online research protocol.

|            | Veterinary Hospital Clients (n=459) |          |          |
|------------|-------------------------------------|----------|----------|
|            | Factor 1                            | Factor 2 | Factor 3 |
| Full ZBI   | 0.84                                | 0.73     | 0.82     |
| PSS        | 0.42                                | 0.34     | 0.49     |
| Q-LES-Q-SF | -0.36                               | -0.28    | -0.37    |

Note. All correlations are significant at  $P < 0.001$ .
